# Supplementary material for: Enhanced photocatalytic activity of g-C3N4/MnO composites for hydrogen evolution under visible light
Source: Royal Society of Chemistry journal article supplement (doi:10.1039/c9dt02748c), 2019-01-01
Supplement: c9dt02748c1.pdf [file c9dt02748c1.pdf]

## ***Supporting Information for***

### **Enhanced photocatalytic activity of g-C<sub>3</sub>N<sub>4</sub>/MnO composites for hydrogen evolution under visible light**

Na Mao<sup>a,b</sup>, Xiaomin Gao<sup>a</sup>, Chong Zhang<sup>a</sup>, Chang Shu<sup>a</sup>, Wenyan Ma<sup>a</sup>, Feng Wang<sup>c,d</sup>,  
and Jia-Xing Jiang<sup>a,\*</sup>

<sup>a</sup> Shaanxi Key Laboratory for Advanced Energy Devices, Key Laboratory for Macromolecular Science of Shaanxi Province, School of Materials Science and Engineering, Shaanxi Normal University, Xi'an, Shaanxi, 710062, P. R. China. E-mail: [jiaxing@snnu.edu.cn](mailto:jiaxing@snnu.edu.cn).

<sup>b</sup> College of Chemistry and Materials, Weinan Normal University, Weinan 714099, P. R. China

<sup>c</sup> Key Laboratory for Green Chemical Process of Ministry of Education, School of Chemical Engineering and Pharmacy, Wuhan Institute of Technology, Wuhan 430073, P. R. China

<sup>d</sup> School of Materials Science and Engineering, Zhengzhou University, Zhengzhou 450001, China

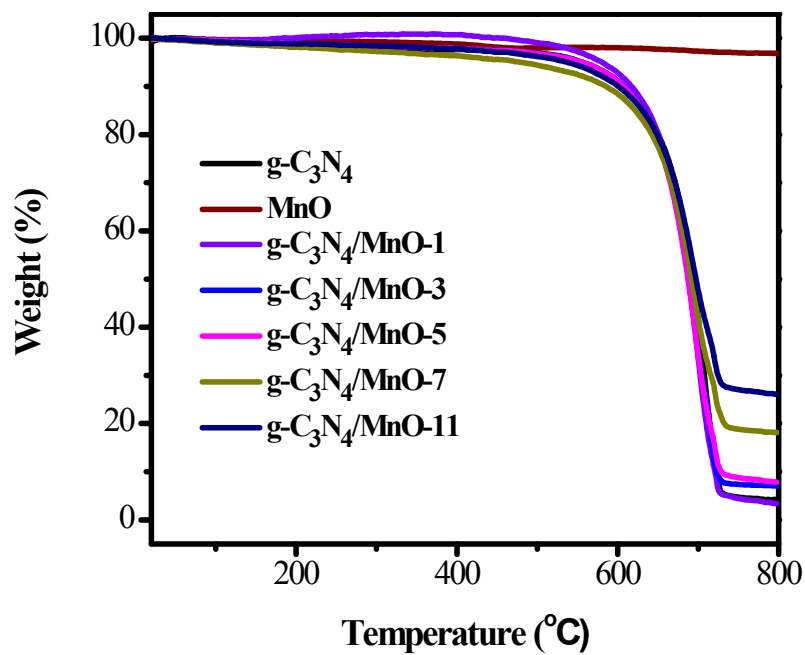

**Fig. S1.** Thermogravimetric analysis curves of g-C<sub>3</sub>N<sub>4</sub> and the g-C<sub>3</sub>N<sub>4</sub>/MnO composites under N<sub>2</sub> atmosphere.

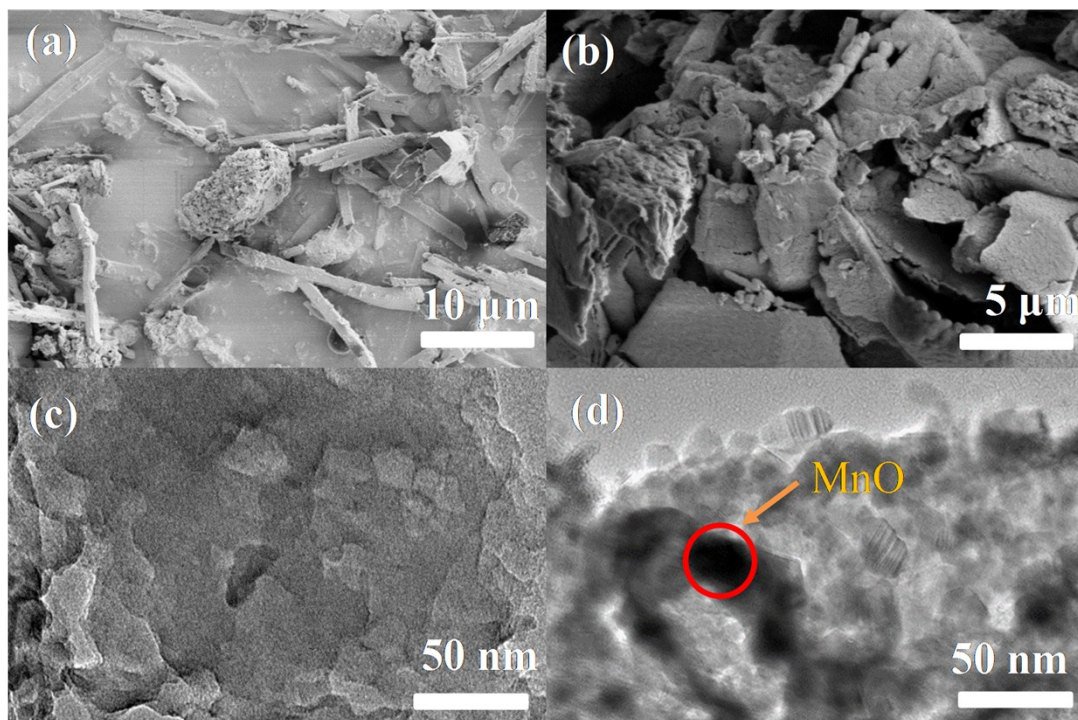

**Fig. S2.** (a) and (b) Scanning electron microscopy images of pure g-C<sub>3</sub>N<sub>4</sub> from melamine, (c) Transmission electron microscopy images of g-C<sub>3</sub>N<sub>4</sub> and (d) the g-C<sub>3</sub>N<sub>4</sub>/MnO-5 composite.

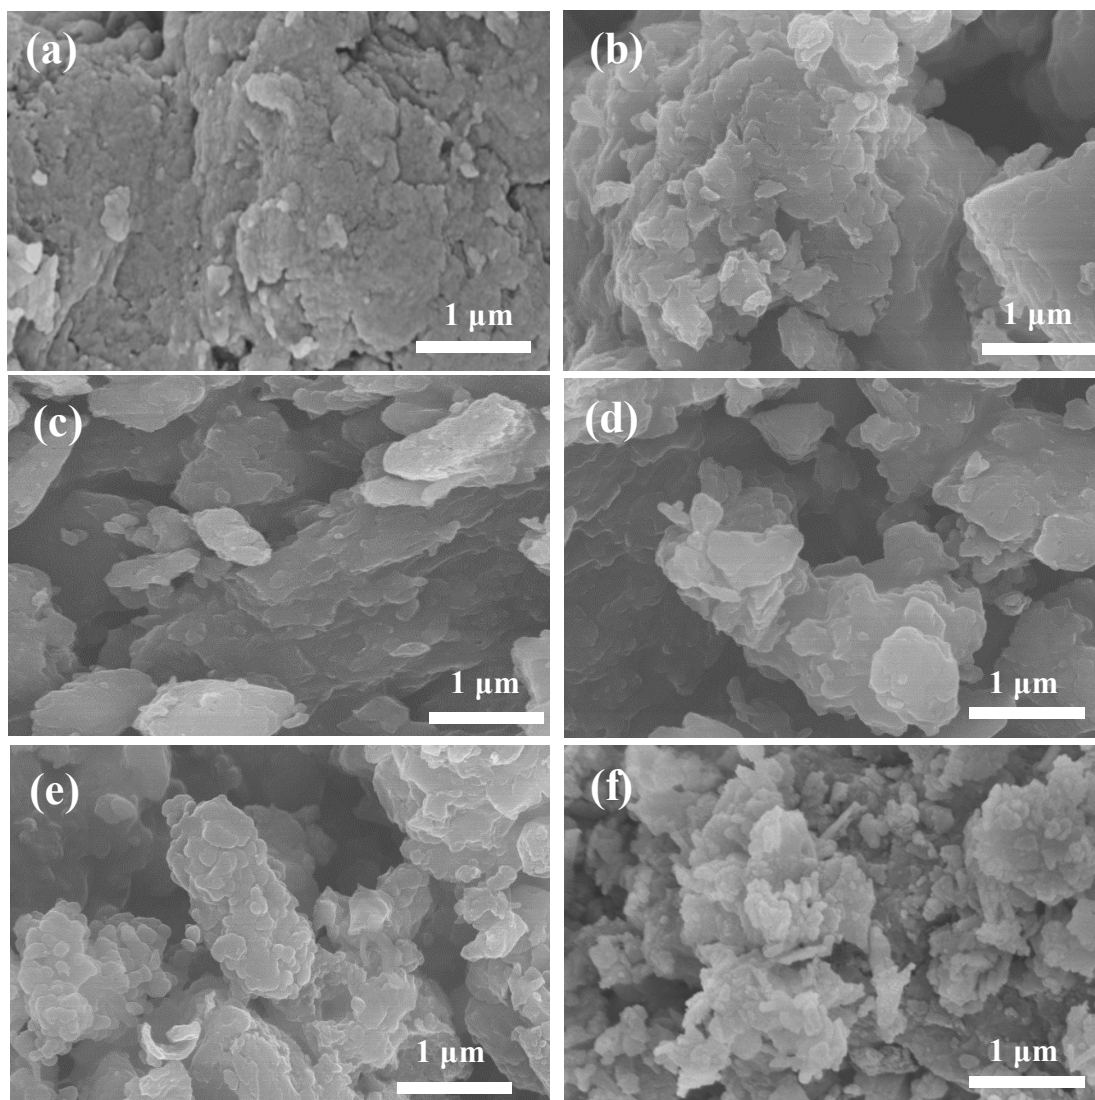

**Fig. S3.** Scanning electron microscopy images of (a) pure g-C<sub>3</sub>N<sub>4</sub>; (b) g-C<sub>3</sub>N<sub>4</sub>/MnO-1 composite; (c) g-C<sub>3</sub>N<sub>4</sub>/MnO-3 composite; (d) g-C<sub>3</sub>N<sub>4</sub>/MnO-5 composite; (e) g-C<sub>3</sub>N<sub>4</sub>/MnO-7 composite; (f) g-C<sub>3</sub>N<sub>4</sub>/MnO-11 composite;

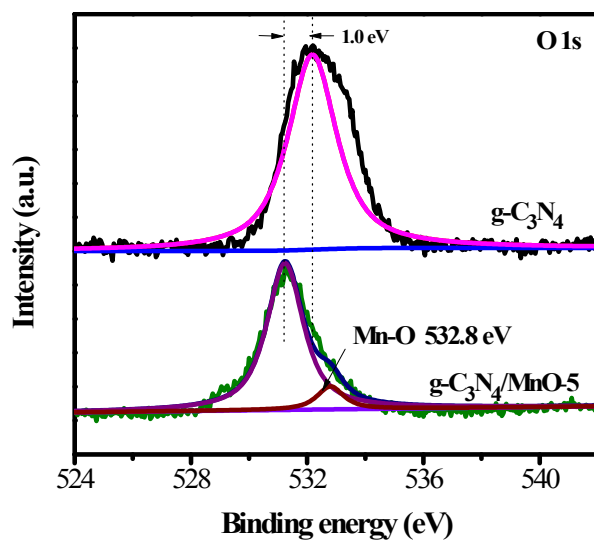

Fig. S4. XPS spectra of the bare  $g\text{-C}_3\text{N}_4$  and the  $g\text{-C}_3\text{N}_4/\text{MnO-5}$  composite for O 1s.

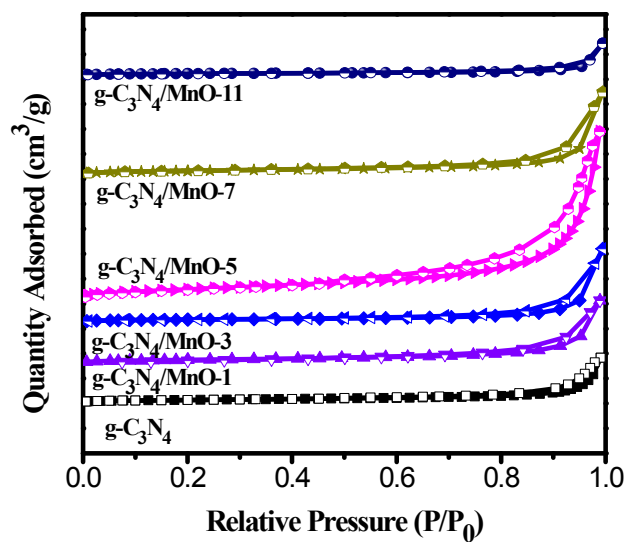

Fig. S5. Nitrogen adsorption (filled symbols) / desorption (empty symbols) isotherms for the bare  $g\text{-C}_3\text{N}_4$  and the  $g\text{-C}_3\text{N}_4/\text{MnO}$  composites collected at 77.3 K.

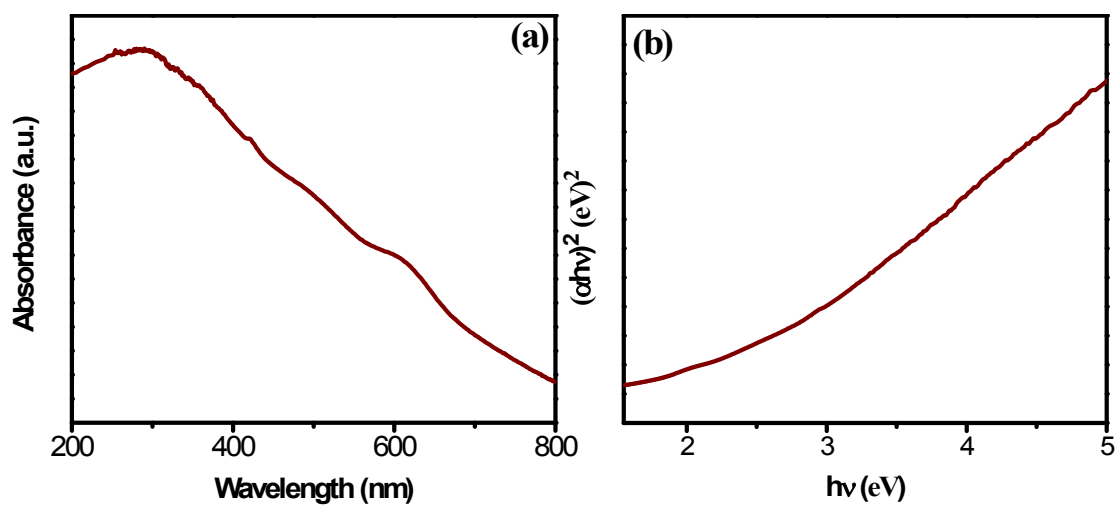

Fig. S6. (a) The UV-Vis reflection spectrum of MnO; (b) Band-gap plot for MnO.

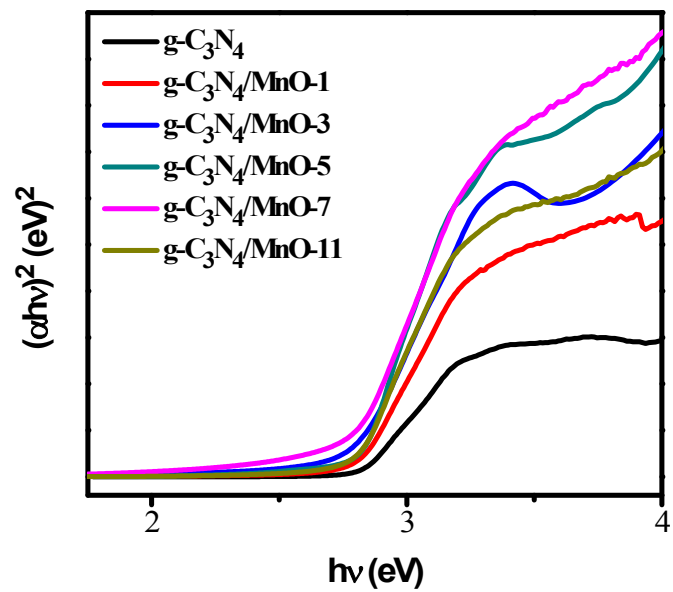

Fig. S7. Band-gap plots of all of the samples.

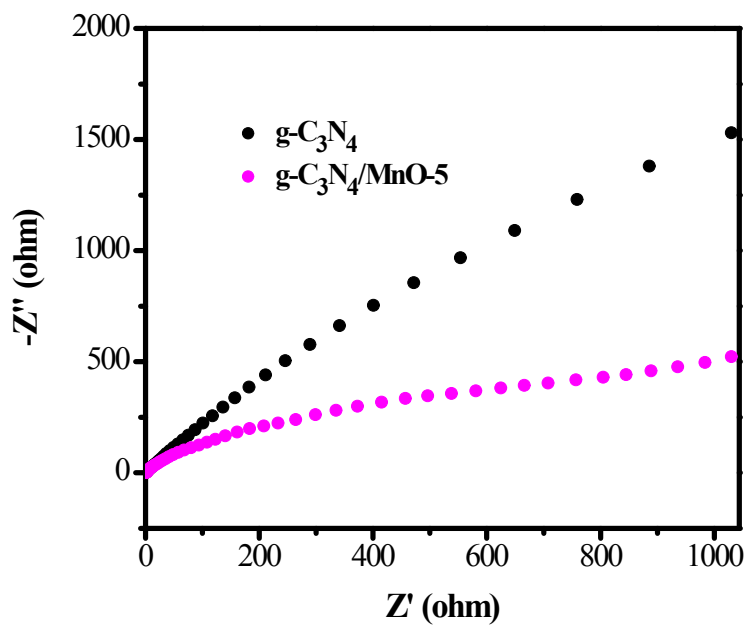

Fig. S8. EIS plots of the bare g-C<sub>3</sub>N<sub>4</sub> and the g-C<sub>3</sub>N<sub>4</sub>/MnO-5 composite.

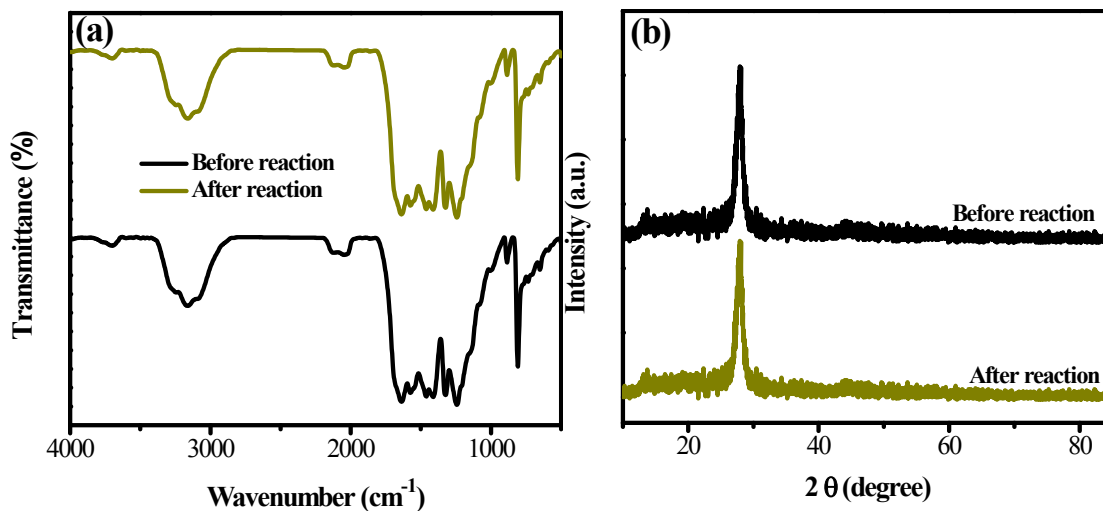

**Fig. S9.** (a) FT-IR spectra, and (b) Powder XRD patterns of the g-C<sub>3</sub>N<sub>4</sub>/MnO-5 composite before and after irradiation under visible light ( $\lambda > 400$  nm) for 15 h in a triethanolamine/water mixture.

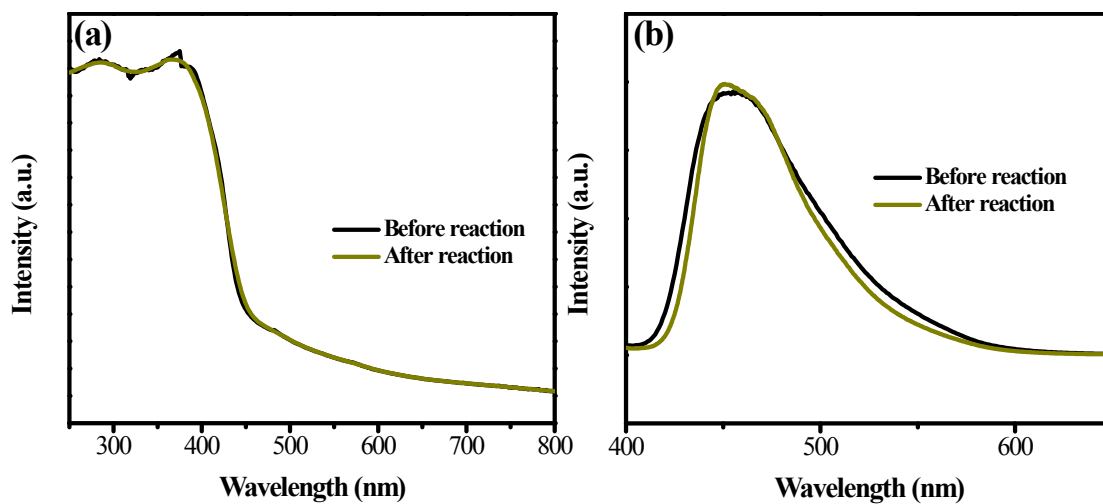

**Fig. S10.** (a) UV-Vis spectra of the g-C<sub>3</sub>N<sub>4</sub>/MnO-5 composite, and (b) Photoluminescence spectra ( $\lambda_{\text{excitation}} = 365$  nm) of the g-C<sub>3</sub>N<sub>4</sub>/MnO-5 composite before and after irradiation under visible light ( $\lambda > 400$  nm) for 15 h in a triethanolamine/water mixture.

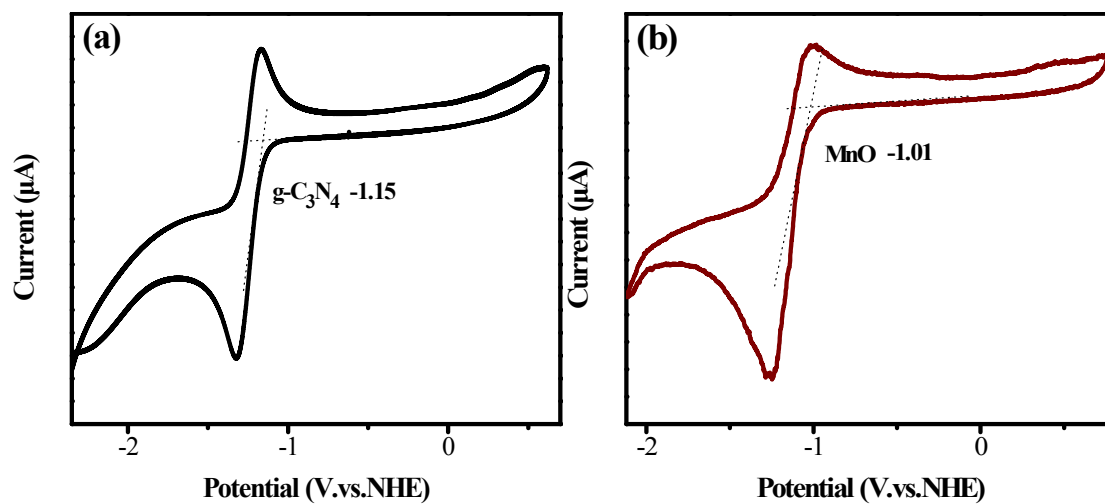

Fig. S11. Cyclic voltammetry measurement for (a)  $\text{g-C}_3\text{N}_4$  and (b)  $\text{MnO}$ .

**Table S1.** Weight percentage of C, N, O, Mn in the g-C<sub>3</sub>N<sub>4</sub>/MnO-5 composite and g-C<sub>3</sub>N<sub>4</sub>

| samples                                | Weight (%)       |                  |                   | Atomic Ratios |      |
|----------------------------------------|------------------|------------------|-------------------|---------------|------|
|                                        | C <sup>(a)</sup> | N <sup>(a)</sup> | Mn <sup>(b)</sup> | N/C           | C/Mn |
| g-C <sub>3</sub> N <sub>4</sub>        | 34.66            | 59.25            | --                | 1.54          | -    |
| g-C <sub>3</sub> N <sub>4</sub> /MnO-5 | 32.51            | 57.64            | 2.89              | 1.56          | 54   |

(a) Data obtained by EA, (b) Data obtained by ICP-MS

**Table S2.** The BET surface area, pore volume and pore size of g-C<sub>3</sub>N<sub>4</sub>, g-C<sub>3</sub>N<sub>4</sub>/MnO-5 composite

| Photocatalyst                           | <sup>a</sup> S <sub>BET</sub> / m <sup>2</sup> ·g <sup>-1</sup> | <sup>b</sup> Pore volume/cm <sup>3</sup> ·g <sup>-1</sup> | Pore size/nm |
|-----------------------------------------|-----------------------------------------------------------------|-----------------------------------------------------------|--------------|
| g-C <sub>3</sub> N <sub>4</sub>         | 12                                                              | 0.06                                                      | 20.8         |
| g-C <sub>3</sub> N <sub>4</sub> /MnO-1  | 13                                                              | 0.10                                                      | 29.4         |
| g-C <sub>3</sub> N <sub>4</sub> /MnO-3  | 14                                                              | 0.01                                                      | 33.3         |
| g-C <sub>3</sub> N <sub>4</sub> /MnO-5  | 48                                                              | 0.25                                                      | 18.8         |
| g-C <sub>3</sub> N <sub>4</sub> /MnO-7  | 18                                                              | 0.13                                                      | 28.8         |
| g-C <sub>3</sub> N <sub>4</sub> /MnO-11 | 6                                                               | 0.03                                                      | 23.5         |
| MnO                                     | 9                                                               | 0.05                                                      | 0            |

a. BET Surface Area; b. *t*-plot micropore volume.**Table S3.** Radiative fluorescence lifetimes and their relative percentages of photoexcited charge carriers in the g-C<sub>3</sub>N<sub>4</sub> and g-C<sub>3</sub>N<sub>4</sub>/MnO-5 composite.

| Sample                                 | $\tau_1$ (ns)(Rel %) | $\tau_2$ (ns)(Rel %) | $\tau_3$ (ns)(Rel %) | $t_{av}$ (ns) <sup>a</sup> |
|----------------------------------------|----------------------|----------------------|----------------------|----------------------------|
| g-C <sub>3</sub> N <sub>4</sub>        | 1.13-38.00           | 4.41-47.55           | 26.62-14.45          | 17.62                      |
| g-C <sub>3</sub> N <sub>4</sub> /MnO-5 | 0.90-37.56           | 3.49-52.91           | 19.73-9.53           | 10.79                      |
